# Supplementary material for: Improvement of an index oriented methodology for consequence analysis of natural hazards: application to the Upper Guil Catchment (Southern French Alps)
Source: Copernicus journal article supplement (doi:10.5194/nhess-2017-323), 2017-09-15
Supplement: Supplementary file [file nhess-2017-323-AC3-supplement.zip]

# Upgrading of an index oriented methodology for consequence analysis of natural hazards: application to the Upper Guil Catchment (Southern French Alps)

Benoît Carlier <sup>1</sup>, Anne Puissant <sup>2</sup>, Constance Dujarric <sup>1</sup>, Gilles Arnaud-Fassetta <sup>1</sup>

5 <sup>1</sup> Université Paris-Diderot (Paris 7), Sorbonne Paris Cité, UMR 8586 PRODIG, 5 rue Thomas Mann, 75013 Paris, France.

<sup>2</sup> Université de Strasbourg, UMR 7362 LIVE, 3 rue de l'Argonne, 67000 Strasbourg, France.

*Correspondence to:* Benoît Carlier (carlierbenoit@hotmail.fr) and Anne Puissant (anne.puissant@live-cnrs.unistra.fr)

## 10 Abstract

Vulnerability is a complex concept involving a variety of disciplines from both physical and socio-economic sciences. Currently, two opposite trends exist: the physical approach in which vulnerability is analysed as a sum of potential impacts on elements at risk; and the social approach in which vulnerability is mostly viewed as a combination of socio-economic variables determining people's ability to anticipate, cope with and recover from a catastrophic event. Finding a way to combine these two approaches is a key issue for a global vulnerability assessment. In this paper we propose to combine elements from these two approaches through the analysis of the potential consequences of a high magnitude flood event (R.I. > 100 years) on human and material stakes. To perform our analysis, we choose to upgrade an existing index, the *Potential Damage Index* (PDI; Puissant *et al.*, 2013), by including social criteria. The PDI was originally developed to assess physical consequences of hazards on the elements at risk (people, building and lands). It is based on the calculation of 3 sub-indexes representing different types of direct and indirect consequences: Physical Injury Consequences (PIC), Structural and Functional Consequences (SFC), Indirect Functional Consequences (IC). Here, we propose to add a fourth sub-index representing the social consequences. This new sub-index, called Social Consequences (SC) is obtained by combining criteria derived from INSEE French census data and a risk perception survey conducted on the field. By combining the 4 indexes (PIC, SFC, IC and SC), we managed to create a new index called *Potential Consequences Index* (PCI). The new PCI was tested on the Upper Guil Catchment to assess the consequences of a high magnitude flood event (R.I. > 100 years). Results of the PDI were compared with the PCI and show significant differences. The upgrade made on the PDI method provided us with many inputs. The introduction of elements coming from social vulnerability added an extra-dimension to the Total Consequence map. It allowed to qualify the potential physical consequences (physical injury, structural and functional consequences) on element at risk by considering the global resilience of local communities.

## 35 Introduction

In Europe, small alpine communities are particularly exposed to natural hazards due to characteristics inherent to the physical and the socio-economic environment (Zingari and Fiebigler, 2002). Alpine areas are generally characterized by step gradient, tectonic activity and harsh climates

resulting in dynamic gravitational and torrential processes causing hazards (Keiler and Fuchs, 2016; Papathoma-Köhle *et al.*, 2011). They are also characterized by a high level of vulnerability caused by scattered populations and resources (Hewitt and Metha, 2012), limited accessibility (Leone *et al.*, 2014) and strong dependencies to seasonal tourism activities (Elsasser and Bürki 2002; Muhar *et al.*, 2007). In addition, the lack of building zones leads to a concentration of stakes in areas exposed to natural hazards (debris fans, floodplains, unstable terrains etc.) causing risk (Arnaud-Fassetta *et al.*, 2005; Puissant *et al.*, 2013). For communities with limited resources, risk management leads to important costs and has a significant impacts on the public opinion (Barroca *et al.*, 2005). As the global climatic and socio-economic environment changes drastically, this concern is growing up (Pachauri *et al.*, 2007; Papathoma-Köhle *et al.*, 2011; 2016; Aitsi-Selmi *et al.*, 2015; Alcántara-Ayala *et al.*, 2015). The Alpines environment is in fact, very sensitive to global changes (IPCC, 2012). The impacts of such changes on hazards magnitudes and frequencies will be significant and may increase the probability of occurrence of catastrophic event (Schoeneich and De Jong, 2008; Keiler *et al.*, 2010; Lafaysse, 2011; IPCC, 2012; Papathoma-Köhle *et al.* 2016).

However, studies on risk assessment at regional or local scale are frequently hazard-centred. As a consequence, the vulnerability component is often limited (Reghezza, 2006; Reghezza and Rufat, 2015; Zahran *et al.*, 2008; Jeffers, 2013). It is now recognized that risk assessment cannot be reduced by focusing solely on the hazards (Birkmann *et al.*, 2013). Vulnerability is also an essential part of the risk assessment (Varnes, 1984; Fuchs *et al.*, 2017). Vulnerability assessment related to natural hazards is a relatively recent research field (Totschnig and Fuchs, 2013). There is still no consensus on a single definition of vulnerability (Fuchs *et al.*, 2007; Birkmann *et al.*, 2013). It is a complex concept involving a variety of disciplines from both physical and socio-economic sciences (Fuchs, 2007, Fuchs *et al.*, 2009; Birkmann *et al.*, 2013; Papathoma-Köhle *et al.*, 2017). If the number of vulnerability components is also debated (Tapsell *et al.*, 2010; Ciurean *et al.*, 2013), two main research approaches dominate: the “physical approach” and the “social approach”. For environmental researchers and engineers, vulnerability is defined as “a degree of loss to a given element within the area affected by a hazard” (UNDRO, 1984). Vulnerability is so considered as the total potential consequences of a process impacting human interests (Glade, 2003; Fuchs *et al.*, 2007; Puissant *et al.*, 2013). Social scientists define vulnerability as “the characteristics of a person or group in terms of their capacity to anticipate, cope with, resist and recover from impacts of a hazard” (Blaikie *et al.*, 1994; Cutter *et al.*, 2003; Steinführer *et al.*, 2009). It refers to socio-economic and demographic factors that may affect the resilience of communities (Clark *et al.*, 1998; Cutter *et al.*, 2003; Wu *et al.*, 2002; Chakraborty *et al.*, 2005; Flanagan *et al.*, 2011). These two theories must be combined in order to reduce susceptibility to hazard and to create disaster-resilient communities (Fuchs, 2009; Fuchs *et al.*, 2012; Birkmann *et al.*, 2013). Recently, significant efforts were made to combine social and physical vulnerability. For example, Ebert *et al.* (2009) combined social vulnerability indicators with physical characteristics derived from airborne imagery and GIS data. Armas and Gavris (2013) and Armas *et al.*, (2017) combined social and economic vulnerability with housing quality. Koks *et al.*, (2015) combined hazard and exposure with a social vulnerability index to assess flood risk in the Netherlands. In the same way, Chang *et al.*, (2015) used vulnerability indicators considering the economic, social, built and natural capital. Karagiorgos *et al.* (2016) used vulnerability function and socio economic variables to assess physical and social vulnerability of the elements at risk face to a flash-floods event in East Attica, Greece. Eidsvig *et al.*, (2017) used a physical vulnerability indicator together with a social vulnerability indicator to assess the risk induced by natural hazards to infrastructures.

Currently, three different methods are commonly used to assess vulnerability: (1) vulnerability matrices, (2) vulnerability functions and (3) vulnerability indicators (Messner *et al.*, 2007; Papathoma-

85 Köhle *et al.*, 2017). (1) Vulnerability matrices are a qualitative method which provides some advantages. The relationship between process and consequence is clearly expressed and easy to understand by non-experts. The information on the exact intensity of the processes is not needed and the costs of the exact damages expressed in monetary value is not requested (Fuchs *et al.*, 2007; Papathoma-Köhle *et al.*, 2017). The main default of matrices remains in the description of damages.

90 They may be very subjective making it difficult to replicate to another sector. By contrast, vulnerability functions (i.e. damage curves and fragility functions) (2) express vulnerability in a quantitative way by translating damage into monetary value (Fuchs *et al.*, 2007; Messner *et al.*, 2007; Tarbotton *et al.*, 2015). As a result, vulnerability function allows us to establish a clear relation between financial losses and hazard intensity and realize cost-benefit analysis (Tarbotton *et al.*, 2015; Papathoma-Köhle *et al.*, 2017). On the other hand, vulnerability functions are dependent on the quality and the quantity of the data collected. They require a large number of the element at risk to be efficient and they cannot be transferred to areas with different housing types. Last but not least, important characteristics of the element at risk are not taken into account (Papathoma-Köhle *et al.*, 2017). For Rygel *et al.*, 2006, Birkmann, 2006, and Kappes *et al.* (2012) the more effective solution to assess vulnerability is to create an index from a suite of indicators (3). This approach provides many advantages: it includes the analysis of all the relevant types of consequences without monetary measures (Meyer *et al.*, 2009), no empirical data is needed (Papathoma-Köhle *et al.*, 2017), it considers the different characteristics of the element at risk (Puissant *et al.*, 2013) and it is flexible enough to be adjusted to different hazards and places (Kappes *et al.*, 2012). Furthermore, the improvement of GIS technology with the ability to integrate information from various fields makes it easy to develop high resolution vulnerability index with an operative perspective (Wood & Good, 2004; Nelson *et al.*, 2015).

In the context of the French funded ANR project SAMCO (*Society Adaptation for coping with Mountain risks in a global change Context*), a comparative analysis on the topic of mountain risks was engaged on three mountain representative case studies: The Upper-Guil catchment (southern French Alps) prone to torrential floods, the Ubaye catchment (southern French Alps) predisposed to landslides and the Cauterets Valley (French Pyrenees) affected by rockfalls. The aim of the project was to develop methodological tools to characterize and measure societal resilience with an operative perspective (www.anr-samco.com, 2017). In this regard, studies were conducted with consideration to the different steps of risk analysis - i.e. hazard analysis, exposure analysis and consequences analysis (Bründl *et al.*, 2009). The final product of the SAMCO project is a GIS-based demonstration platform for elected officials and local stakeholders. The present paper is focussed on a new method to assess physical and social vulnerability together. This method was developed to assess the vulnerability of elements at risk in the Upper Guil catchment (Fig.1) in front of a high magnitude flood event (R.I. > 100 years). To perform this work, we opted for an indicator-based vulnerability approach. The proposed indicator, called *Potential Consequences Index* (PCI) is oriented on potential consequences assessment. According to Fell *et al.* (2008), consequences may be defined as “the potential outcomes arising from the occurrence of a hazard expressed qualitatively or quantitatively, in terms of loss, disadvantage or gain, damage, injury or loss of life”. Consequence analysis is, together with hazard evaluation, one of the major steps of flood risk assessment (Bründl *et al.*, 2009; Kappes *et al.*, 2012; Puissant *et al.*, 2013).

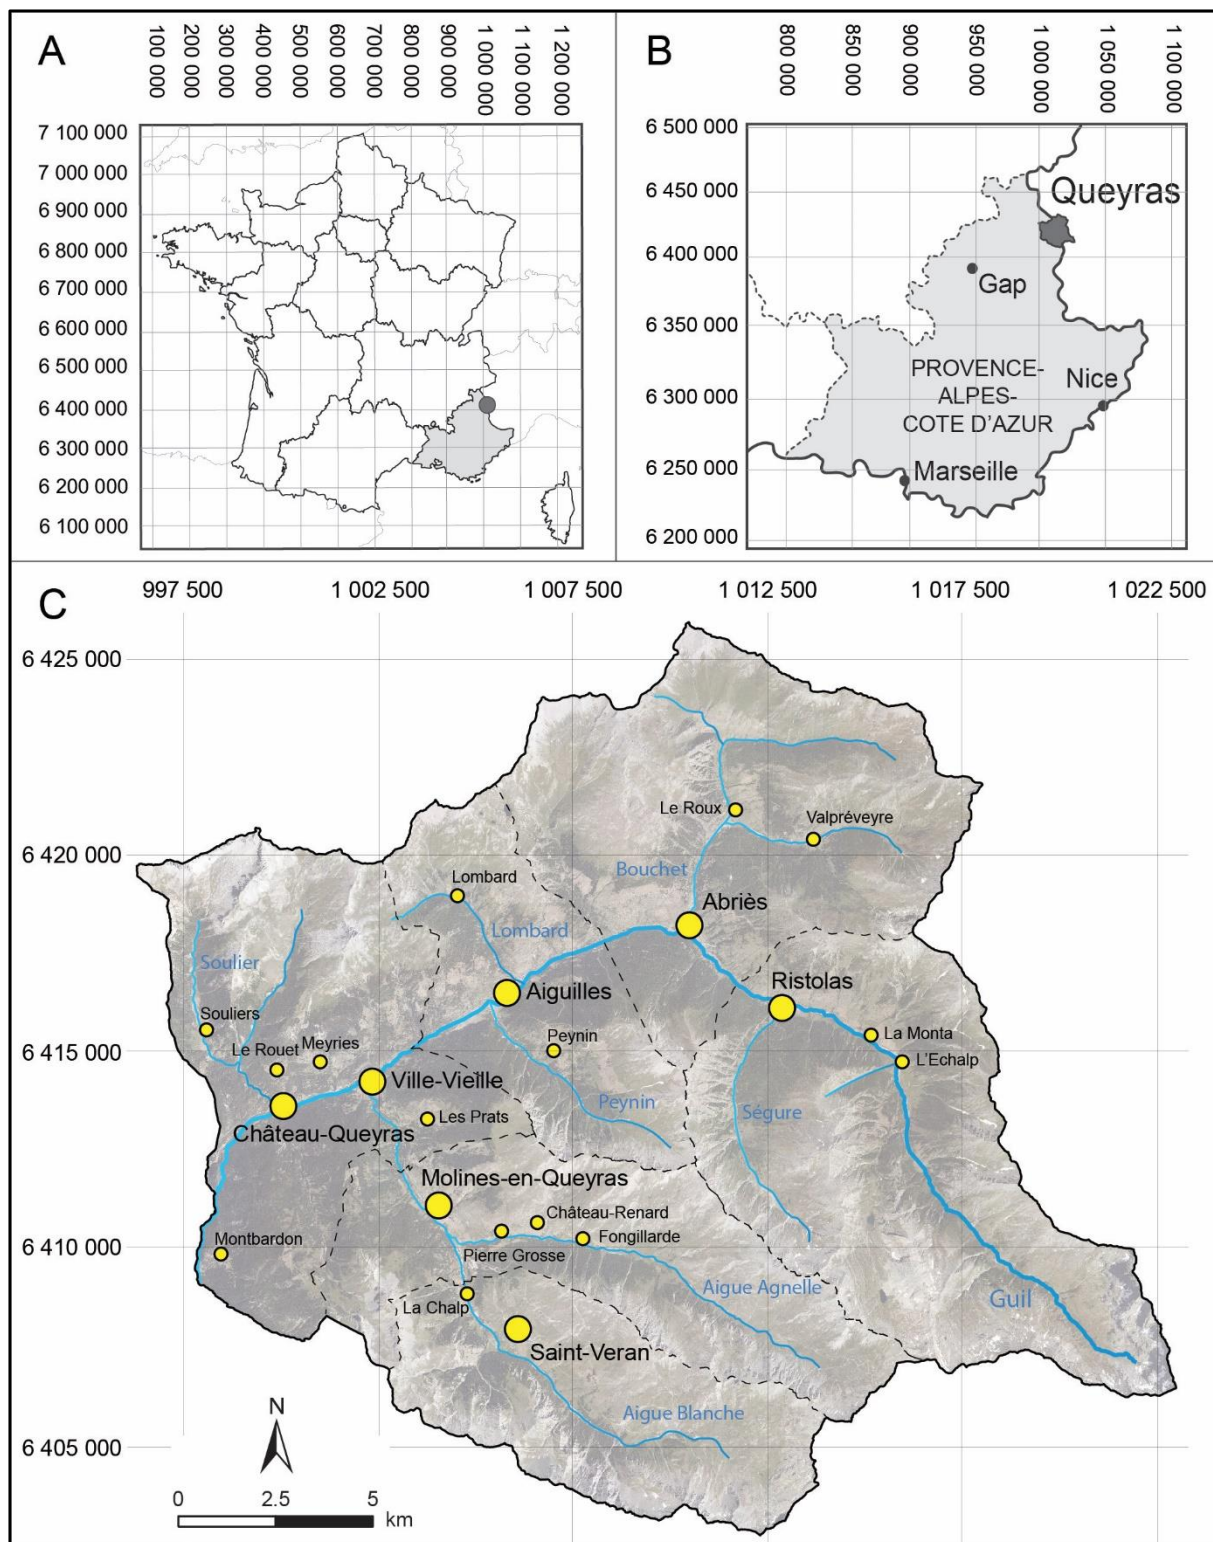

**Figure 1:** Location map of the Upper Guil catchment and its six communities.

In the context of the French funded ANR project SAMCO (*Society Adaptation for coping with Mountain risks in a global change Context*), a comparative analysis on the topic of mountain risks was engaged on three mountain representative case studies: The Upper-Guil catchment (southern French Alps) prone to torrential floods, the Ubaye catchment (southern French Alps) predisposed to landslides and the Cauterets Valley (French Pyrenees) affected by rockfalls. The aim of the project was to

develop methodological tools to characterize and measure societal resilience with an operative perspective (www.anr-samco.com, 2017). In this regard, studies were conducted with consideration to the different steps of risk analysis - i.e. hazard analysis, exposure analysis and consequences analysis (Bründl *et al.*, 2009). The final product of the SAMCO project is a GIS-based demonstration platform for elected officials and local stakeholders. The present paper is focussed on a new method to assess physical and social vulnerability together. This method was developed to assess the vulnerability of elements at risk in the Upper Guil catchment (Fig.1) in front of a high magnitude flood event (R.I. > 100 years). To perform this work, we opted for an indicator-based vulnerability approach. The proposed indicator, called *Potential Consequences Index* (PCI) is oriented on potential consequences assessment. According to Fell *et al.* (2008), consequences may be defined as “the potential outcomes arising from the occurrence of a hazard expressed qualitatively or quantitatively, in terms of loss, disadvantage or gain, damage, injury or loss of life”. Consequence analysis is, together with hazard evaluation, one of the major steps of flood risk assessment (Bründl *et al.*, 2009; Kappes *et al.*, 2012; Puissant *et al.*, 2013). The PCI consists in upgrading an existing index called *Potential Damage Index* (PDI). The PDI was developed and improved by Puissant *et al.* (2006; 2013) to estimate the potential consequences of a natural hazard on elements at risk (building, network and land occupation). It is obtained by combining three indices representing direct - physical injury and structural and functional consequences - and indirect consequences - indirect functional consequences - of hazards on the element at risk. These 3 indices are built with data representing the characteristics of each element at risk (material, age, number of occupied floors etc.). In the PCI we added a fourth index called *Social Consequences Index* (SCI) representing the socio-economic consequences of a hazard on the community resilience. SCI variables are derived from French national census data at community level (INSEE) and data from a risk-perception survey conducted in the six municipalities of the Upper-Guil catchment (Ristolas, Abriès, Aiguilles, Château-Ville-Vieille, Molines-en-Queyras and Saint-Véran). The *Potential Consequences Index* is obtained by combining the new *Social Consequences Index* with the *Physical Injury Index*, the *Structural and Functional Index* and the *Indirect Functional Index* coming from the PDI. Results obtained for the *Potential Consequences Index* are then applied to the Upper-Guil catchment and compared to those obtained with the *Potential Damage Index*.

## 1. Study area

The area of interest is the Upper Guil catchment, a 366 km<sup>2</sup> area covering 6 small municipalities (< 400 inhabitants): Ristolas, Abriès, Aiguilles, Château-Ville-Vieille, Molines-en-Queyras and St-Véran. It broadly corresponds to the historic territory of Queyras, a landlocked area located in the “Hautes-Alpes” French department, near the Italian border (Fig. 1). The altitude ranges from 1200 m.a.s.l. at the outflow of the River Guil to over 3300 m.a.s.l. along the highest summits surrounding the catchment.

### 1.1 Physical context

Due to some predisposing (schist bedrock supplying abundant debris, structural opposite slopes, strong hillslope channel connectivity) and triggering (summer and winter Mediterranean rainstorms) factors, the Upper Guil catchment is particularly prone to hydrogeomorphic hazards such as torrential floods, debris flows, landslides, rockfalls or avalanches (Fort *et al.*, 2002, 2014; Arnaud-Fassetta *et al.*, 2004, 2005, 2014). These hazards frequently impact the local population (fatalities, destruction of buildings and infrastructures, loss of agricultural land, road closures) causing difficulties for local managers, who also have to cope with the legislation and management procedures of the *Parc Naturel Régional du Queyras* (PNRQ) (Arnaud-Fassetta *et al.*, 2004, 2005). Most catastrophic

episodes are related to torrential floods as in 1957, 2000, 2002, 2008 and 2011 (PNRQ, 2016). The two main events described in the literature took place in June 1957 (> 100 year R.I., 15 million euros damage) and June 2000 (30 year R.I.,  $\approx$  5 million euros damage) (Arnaud-Fassetta *et al.*, 2004; Tricart, 1958). These catastrophic episodes have severely impacted the mentalities and entailed considerable expenses in terms of risk management and protective structures (dykes, embankments, thresholds etc.) (Fig.2). Due to the obsolescence of protective measures and local planner needs in new studies, it was necessary to assess vulnerability in this area.

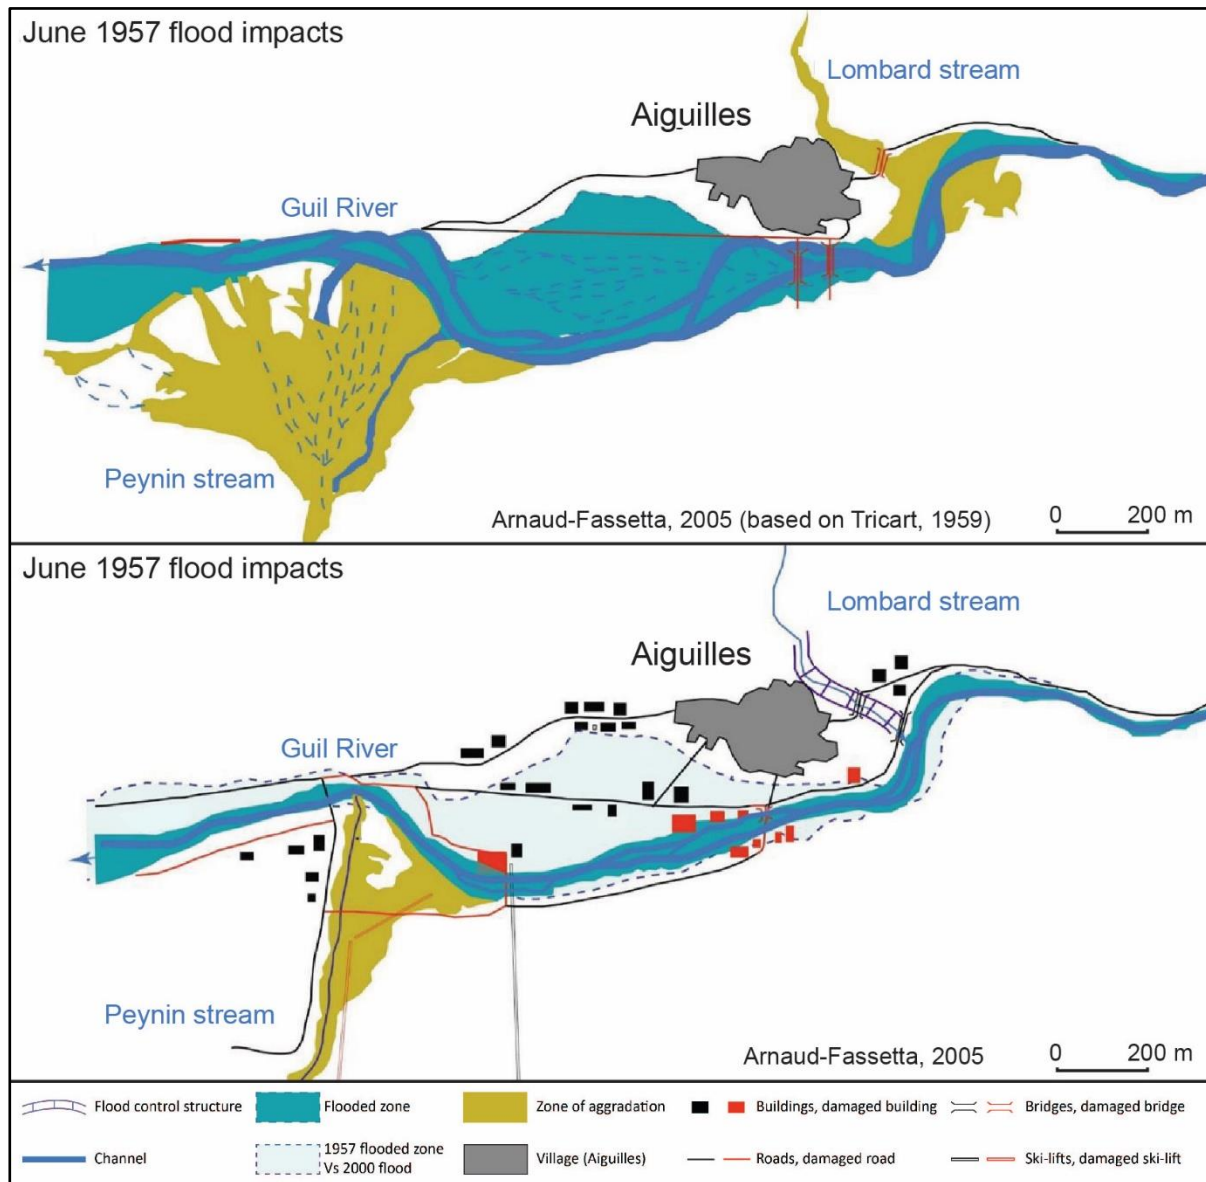

**Figure 2:** Impacts of the June 1957 and June 2000 flood on Aiguilles village.

### 1.2 Socio-economic context

Today, the area counts 1770 inhabitants (Insee, 2012), making it one of France's less densely populated districts (< 5 inhabitants by km<sup>2</sup>). However, during the peak of touristic season (summer and winter holidays), the resident population can be multiplied by a factor of 10 (Insee, 2006). Since the second half of the 20th century, the territory has experienced significant changes on its land cover/uses and economic activities. The progressive decline of agro-pastoralism and the development



of skiing tourism activities led to a concentration of human stakes in areas that are particularly exposed to several natural hazards (torrential fans and valley bottom). The current land cover/use is the result of a combination of these important changes in human activities together with the impacts of past catastrophic events. Actually, land cover classes count 29 % of forest, around 30 % of bare rocks and alluvial deposits, 38 % of grassland, 3 % of agricultural lands and less than 1 % of building areas. Apart from houses, major stakes are public services/administration (city-hall, schools, hospital, fire station etc.), industrial/artisanal warehouses and, of course, touristic infrastructures (shops, hotels, museum, ski resorts etc.). The departmental road (D947) is the most important lifeline ensuring the link with the nearest urban centres (Guillestre, Embrun, Gap). These relatively recent stakes are mostly located on areas exposed to natural hazards (Arnaud-Fassetta *et al.*, 2004).

## 2. Methods and data

*Potential Consequences Index* (PCI) is used to assess the physical and social consequences of a hazard on elements at risk (people, buildings, networks and land cover/uses). It consists in an upgrade of the *Potential Damage Index* (PDI) developed by Puissant *et al.* (2006; 2013). To a better understand the method, we will first describe the PDI methodology and then take a look at the upgrade made to obtain the PCI.

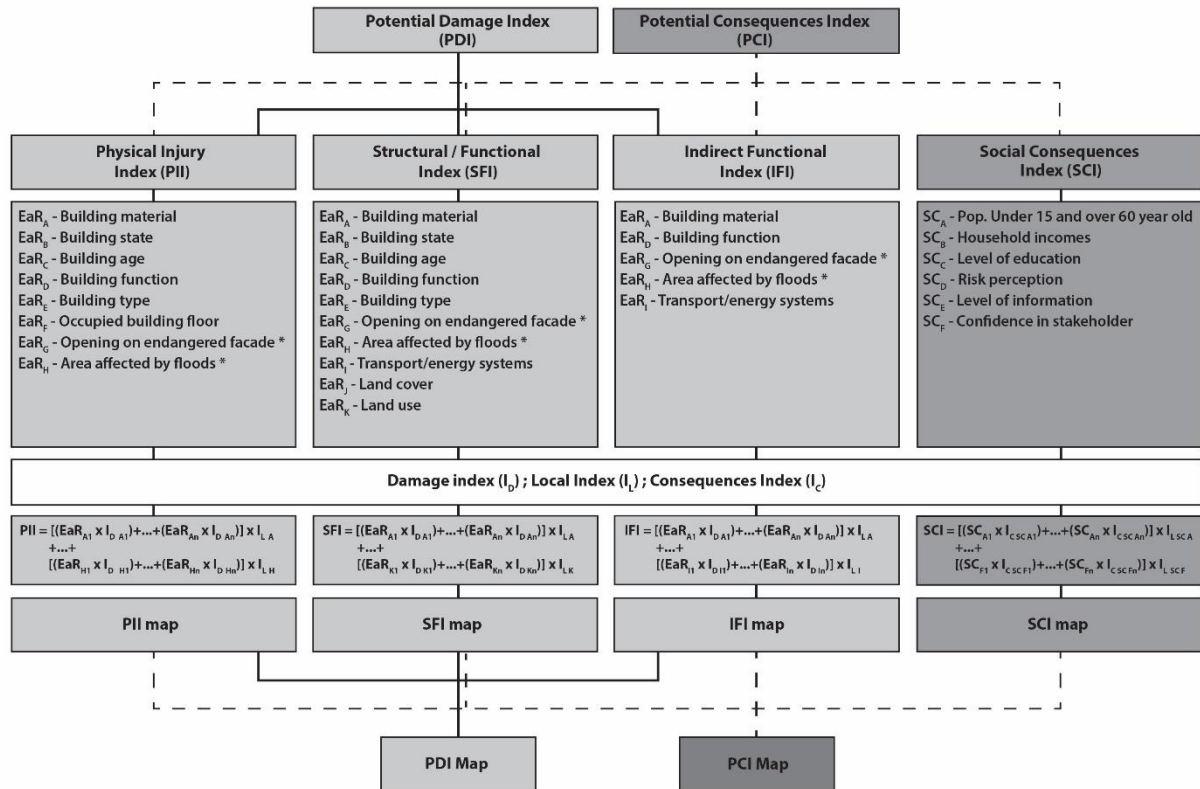

**Figure 3:** Framework of the Potential Damage Index (PDI) compared to the Potential Consequences Index (PCI).

### 2.1 General Framework of the Potential Damage Index (PDI)

The PDI methodology is indicator-oriented. To be used in practice, it is based on the use of commercial databases, aerial imagery and GIS technologies. In the PDI, consequences are expressed in a semi-quantitative way through an index called *Total Consequences Index* (CTI). CTI is obtained

by combining 3 sub-indices representing the direct and indirect consequences of a hazard on elements at risk (Fig. 3): (1) the *Physical Injury Index* (PII) represents the consequences on people in their physical integrity, (2) the direct *Structural and Functional Index* (SFI) expresses the direct and short term effects on buildings, infrastructures and human activities, and (3) the *Indirect Functional Index* (IFI) illustrates the long term effects on socio-economic activities (Puissant *et al.* 2013).

220

| EaR-A | Building material                               | I <sub>D</sub> | I <sub>L-PII</sub> | I <sub>L-SFI</sub> | I <sub>L-IFI</sub> | EaR-F | Occupied floors                              | I <sub>D</sub> | I <sub>L-PII</sub> | I <sub>L-SFI</sub> | I <sub>L-IFI</sub> |
|-------|-------------------------------------------------|----------------|--------------------|--------------------|--------------------|-------|----------------------------------------------|----------------|--------------------|--------------------|--------------------|
| A1    | Wood                                            | 1              |                    |                    |                    | F1    | > 6                                          | 1              |                    |                    |                    |
| A2    | Concrete                                        | 0.80           |                    |                    |                    | F2    | 4 - 6                                        | 0.80           |                    |                    |                    |
| A3    | Mixture (wood & concrete)                       | 0.80           | 2                  | 2                  | 2                  | F3    | 2 - 3                                        | 0.60           | 3                  | n/a                | n/a                |
| A4    | Stone & wood (traditional)                      | 0.60           |                    |                    |                    | F4    | 1                                            | 0.40           |                    |                    |                    |
| A5    | Metal                                           | 0.40           |                    |                    |                    | F5    | 0                                            | 0.10           |                    |                    |                    |
| EaR-B | Building State                                  | I <sub>D</sub> | I <sub>L-PII</sub> | I <sub>L-SFI</sub> | I <sub>L-IFI</sub> | EaR-G | Opening on endangered facade *               | I <sub>D</sub> | I <sub>L-PII</sub> | I <sub>L-SFI</sub> | I <sub>L-IFI</sub> |
| B1    | Good                                            | 1              |                    |                    |                    | G1    | > 6 (or glass wall)                          | 1              |                    |                    |                    |
| B2    | Moderate                                        | 0.70           |                    |                    |                    | G2    | 4 - 6                                        | 0.80           |                    |                    |                    |
| B3    | Bad                                             | 0.30           | 2                  | 2                  | n/a                | G3    | 1 - 3                                        | 0.60           | 2                  | 1                  | n/a                |
| B4    | Very bad (ruin)                                 | 0.10           |                    |                    |                    | G4    | Absence                                      | 0.10           |                    |                    |                    |
| EaR-C | Building Age                                    | I <sub>D</sub> | I <sub>L-PII</sub> | I <sub>L-SFI</sub> | I <sub>L-IFI</sub> | EaR-H | Building in an area affected by flood        | I <sub>D</sub> | I <sub>L-PII</sub> | I <sub>L-SFI</sub> | I <sub>L-IFI</sub> |
| C1    | > 2010                                          | 0.80           |                    |                    |                    | H1    | RI 10 & RI 30 - 50 & RI 100 & RI > 100 flood | 1              |                    |                    |                    |
| C2    | 2000 - 2010                                     | 1              |                    |                    |                    | H2    | RI 30 - 50 & RI 100 & RI > 100 flood         | 0.80           | 3                  | 3                  | 3                  |
| C3    | 1990 - 2000                                     | 1              |                    |                    |                    | H3    | RI 100 & RI > 100 flood                      | 0.60           |                    |                    |                    |
| C4    | 1970 - 1990                                     | 0.90           | 2                  | 2                  | n/a                | H4    | RI > 100 flood                               | 0.40           |                    |                    |                    |
| C5    | 1950 - 1970                                     | 0.70           |                    |                    |                    | H5    | Absence                                      | 0.10           |                    |                    |                    |
| C6    | 1900 - 1950                                     | 0.50           |                    |                    |                    | EaR-I | Transport & energy systems                   | I <sub>D</sub> | I <sub>L-PII</sub> | I <sub>L-SFI</sub> | I <sub>L-IFI</sub> |
| C7    | < 1900                                          | 0.30           |                    |                    |                    | I1    | High-voltage line                            | 1              |                    |                    |                    |
| EaR-D | Building Function                               | I <sub>D</sub> | I <sub>L-PII</sub> | I <sub>L-SFI</sub> | I <sub>L-IFI</sub> | I2    | Main road                                    | 1              |                    |                    |                    |
| D1    | Education                                       | 1              |                    |                    |                    | I3    | Secondary road                               | 0.80           | n/a                | 2                  | 4                  |
| D2    | Emergency                                       | 1              |                    |                    |                    | I4    | Ski lift                                     | 0.70           |                    |                    |                    |
| D3    | Public administration                           | 0.90           |                    |                    |                    | I5    | Gravel road                                  | 0.50           |                    |                    |                    |
| D4    | Tourism                                         | 0.80           |                    |                    |                    | I6    | Track                                        | 0.10           |                    |                    |                    |
| D5    | Trade                                           | 0.80           | 2                  | 3                  | 3                  | EaR-J | Lancover                                     | I <sub>D</sub> | I <sub>L-PII</sub> | I <sub>L-SFI</sub> | I <sub>L-IFI</sub> |
| D6    | Accommodation                                   | 0.80           |                    |                    |                    | J1    | Urban                                        | 0.60           |                    |                    |                    |
| D7    | Industry / Craft                                | 0.70           |                    |                    |                    | J2    | Farming / Pasture                            | 0.35           |                    |                    |                    |
| D8    | Agricultural                                    | 0.40           |                    |                    |                    | J3    | Forest                                       | 0.20           | n/a                | 2                  | n/a                |
| D9    | Religious                                       | 0.20           |                    |                    |                    | J4    | Grass                                        | 0.15           |                    |                    |                    |
| EaR-E | Building type                                   | I <sub>D</sub> | I <sub>L-PII</sub> | I <sub>L-SFI</sub> | I <sub>L-IFI</sub> | J5    | Water surface                                | 0.10           |                    |                    |                    |
| E1    | "Sensitive" (city hall, hospital, fire station) | 1              |                    |                    |                    | J6    | Bare rock, colluvium & alluvium              | 0.05           |                    |                    |                    |
| E2    | Housing                                         | 0.90           |                    |                    |                    | EaR-K | Land use                                     | I <sub>D</sub> | I <sub>L-PII</sub> | I <sub>L-SFI</sub> | I <sub>L-IFI</sub> |
| E3    | Tourism activity                                | 0.70           | 1                  | 1                  | n/a                | K1    | Urban                                        | 1              |                    |                    |                    |
| E4    | Shed and warehouse                              | 0.50           |                    |                    |                    | K2    | Winter tourist activities                    | 0.80           |                    |                    |                    |
| E5    | Cultural heritage                               | 0.30           |                    |                    |                    | K3    | Summer tourist activities                    | 0.60           | n/a                | 4                  | n/a                |
| E6    | Hut                                             | 0.10           |                    |                    |                    | K4    | Arable land                                  | 0.40           |                    |                    |                    |
|       |                                                 |                |                    |                    |                    | K5    | Protected area                               | 0.20           |                    |                    |                    |

**Figure 4:** Detail of weights assigned to the criteria used in PDI calculation.

To obtain these indices and compute the *Total Consequences Index*, 3 steps are required (Puissant *et al.*, 2006). First, the element at risk and its relevant attribute are identified and compiled into a complete database. Then, each modality of the attribute compiled is ranked through an expert weighting (Fig. 3 and 4). The value applied is called Damage Index (di). It is standardized on a scale from zero to one, with higher index values indicating higher potential consequences (Fig. 4). In the third step, direct (PII and SFI) and indirect (IFI) consequences are modelled using linear combination.

225

|              |    | Hazard exposure |    |    |    |    |
|--------------|----|-----------------|----|----|----|----|
|              |    | 1               | 2  | 3  | 4  | 5  |
| Consequences | 10 | 11              | 12 | 13 | 14 | 15 |
|              | 20 | 21              | 22 | 23 | 24 | 25 |
|              | 30 | 31              | 32 | 33 | 34 | 35 |
|              | 40 | 41              | 42 | 43 | 44 | 45 |
|              | 50 | 51              | 52 | 53 | 54 | 55 |

**Figure 5:** Matrix used to combine hazard exposures with PDI and PCI.

In this step, a coefficient is assigned to each variable with respect to the socioeconomic context of the region and the type of consequence assessed (direct or indirect) (Fig. 3 and 4). The coefficient, called *local index* (li) varies from 1 to 4. To finish, the 3 sub-indices are combined to obtain the *Potential Damage Index* (PDI). In order to be used in a risk analysis, PDI is reclassified in 5 classes and mapped. With a matrix, PDI map is then



combined with a hazard map (reclassified in 5 classes as well) to obtain a type 1957 flood risk map (Fig. 5). As support for this work, data sets from *Institut National de l'Information Géographique et forestière* (IGN, BD ORTHO, 2009; BD TOPO, 2009) were used. To complete our database, an intensive field investigation in association with the use of *Google Street View*<sup>®</sup> and *OpenStreetMap*<sup>®</sup> software was realized. Land cover and land uses maps were produced on GIS by combining photo interpretative work with data on natural protected areas (DREAL PACA, 2016), agricultural land (RPG, 2012) and touristic infrastructures (prospectuses, touristic maps etc.).

## 2.2 General Framework of the Potential Consequence Index (PCI)

In the proposed *Potential Consequences Index* (PCI), PDI methodology has been modified to assess both physical and social consequences. The upgrade consists in the addition of a fourth sub-index in the calculation of the *Total Consequence Index* (Fig. 3). This sub-index, called *Social Consequences Index* (SCI) is built to represent the social consequences of a hazard on community resilience. The use of an indicator to assess social consequences requires the selection of specific criteria that unequivocally represents the different aspects of social vulnerability (Cutter *et al.* 2000; Rygel *et al.*, 2006). Literature on vulnerability identifies many elements contributing to differential ability to cope with hazards (Tab. 1). Today, the majority of the analyses produced use data from national census to build social vulnerability indices (Cutter *et al.* 2000; 2008; Wu *et al.* 2002; Chakraborty *et al.*, 2005; Fekete, 2009; Guillard-Gonçalves *et al.*, 2014; Zhang and You, 2014; Huang *et al.*, 2015; Koks *et al.*, 2015; Nelson *et al.*, 2015; Frigerio *et al.*, 2016; Karagiorgos *et al.*, 2016; Rogelis *et al.*, 2016; Aroca-Jimenez *et al.*, 2017; Davis and Heß, 2017). Some indicators repeatedly appear in these analyses such as poverty, age, education or disabilities (Tab. 1).

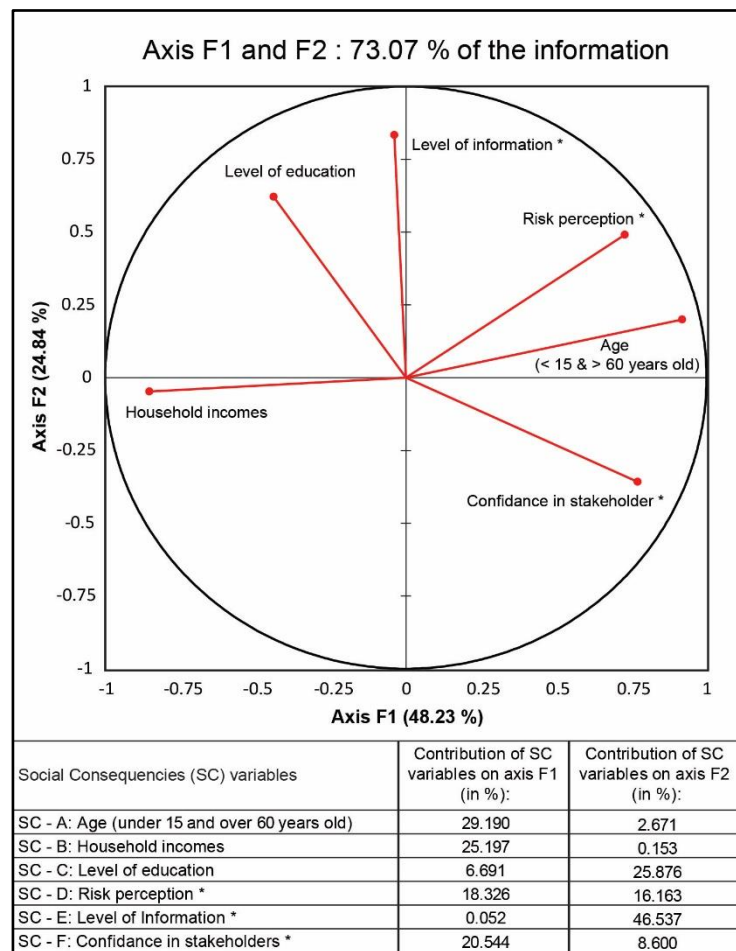

**Figure 6:** Principal Component Analysis (PCA) realised and criteria selected for SCI calculation.

In agreement with these existing published references, socio-economic data were collected for the six municipalities of the Upper-Guil Catchment. A set 21 criteria was first selected (Tab. 2). 16 of them are coming from the open access French national statistical database of the *Institut National de la Statistique et des Etudes Economiques* (INSEE) (Insee, 2012; 2015). 5 other were selected in a risk perception survey realized during the SAMCO project. This survey consisted in a questionnaire (38 questions) carried out during the autumn 2014 and the summer 2015 and 2016 on the six municipalities of the Upper-Guil catchment (Fig. 1). It is focused on 3 main issues: (1) inhabitant

perception of the different risks (torrential floods, avalanches, landslides and rockfalls) (2) inhabitant knowledge of preventive and protective measures and (3) inhabitant confidence in stakeholders. 100 questionnaires were collected (about 5% of the total population): 8 in Ristolas (10.53 %), 22 in Abriès (6.85 %), 22 in Aiguilles (4.95 %), 16 in Château-Ville-Vieille (4.58 %), 17 in Molines-en-Queyras (5.45 %) and 15 in St-Véran (5.86 %). People were surveyed by an interviewer in-person or by paper questionnaires delivered and recovered in person. Special attention was made to have a representative view of the socio-economic characteristics of the local population. Indeed, in the second and third campaign, the surveyed people were selected for their demographic and socio-economic characteristics according to INSEE census data (Insee, 2012; 2015). To reduce the number of variables and avoid useless repetition we realized a principal component analysis (PCA) on our dataset. We conserved only the criteria containing the highest percentage of information on axis F1 and F2 (Fig. 6). They were 6: (1) Age, (2) household incomes, (3) level of education, (4) flood risk perception, (5) level of information on flood risk and (6) confidence in stakeholders (Fig. 6). With respect to PDI methodology, the modalities of the 6 selected criteria were ranked and a value of 0 to 1 was assigned to them (Fig. 7). In PCI methodology the term of *consequence index* (ci) is preferred to *damage index* (id) from PDI. A *local index* (il) is then assigned to the 6 criteria with respect to their relative

| SC - A  | Pop. Under 15 and over 60 year old<br>Population under 15 or over 60 years old (in %)                             | $I_{C-SC}$ | $I_{L-SC}$ |
|---------|-------------------------------------------------------------------------------------------------------------------|------------|------------|
| SC - A1 | More than 50 %                                                                                                    | 1          | 2          |
| SC - A2 | 45 to 50 %                                                                                                        | 0.80       |            |
| SC - A3 | 40 to 45 %                                                                                                        | 0.60       |            |
| SC - A4 | 35 to 40 %                                                                                                        | 0.40       |            |
| SC - A5 | Less than 35 %                                                                                                    | 0.10       |            |
| SC - B  | Household incomes<br>Household incomes / average national household incomes (in %)                                | $I_{C-SC}$ | $I_{L-SC}$ |
| SC - B1 | Less than 60 %                                                                                                    | 1          | 2          |
| SC - B2 | 60 to 70 %                                                                                                        | 0.80       |            |
| SC - B3 | 70 to 80 %                                                                                                        | 0.60       |            |
| SC - B4 | 80 to 90 %                                                                                                        | 0.40       |            |
| SC - B5 | 90 to 100 %                                                                                                       | 0.10       |            |
| SC - C  | Level of education<br>Population with no high diploma (> BAC) (in %)                                              | $I_{C-SC}$ | $I_{L-SC}$ |
| SC - C1 | 75 to 100 %                                                                                                       | 1          | 2          |
| SC - C2 | 50 to 75 %                                                                                                        | 0.70       |            |
| SC - C3 | 25 to 50 %                                                                                                        | 0.40       |            |
| SC - C4 | Less than 25 %                                                                                                    | 0.10       |            |
| SC - D  | Risk perception<br>Investigated population considering flood-risk as low* (in %)                                  | $I_{C-SC}$ | $I_{L-SC}$ |
| SC - D1 | 75 to 100 %                                                                                                       | 1          | 2          |
| SC - D2 | 50 to 75 %                                                                                                        | 0.80       |            |
| SC - D3 | 25 to 50 %                                                                                                        | 0.60       |            |
| SC - D4 | 10 to 25 %                                                                                                        | 0.40       |            |
| SC - D5 | Less than 10 %                                                                                                    | 0.10       |            |
| SC - E  | Level of information<br>Investigated population considering themselves as unsufficiently informed on risk* (in %) | $I_{C-SC}$ | $I_{L-SC}$ |
| SC - E1 | 75 to 100 %                                                                                                       | 1          | 3          |
| SC - E2 | 50 to 75 %                                                                                                        | 0.80       |            |
| SC - E3 | 25 to 50 %                                                                                                        | 0.60       |            |
| SC - E4 | 10 to 25 %                                                                                                        | 0.40       |            |
| SC - E5 | Less than 10 %                                                                                                    | 0.10       |            |
| SC - F  | Confidence in stakeholder<br>Investigated population who have not confidence in local planners* (in %)            | $I_{C-SC}$ | $I_{L-SC}$ |
| SC - F1 | 75 to 100 %                                                                                                       | 1          | 2          |
| SC - F2 | 50 to 75 %                                                                                                        | 0.80       |            |
| SC - F3 | 25 to 50 %                                                                                                        | 0.60       |            |
| SC - F4 | 10 to 25 %                                                                                                        | 0.40       |            |
| SC - F5 | Less than 10 %                                                                                                    | 0.10       |            |

\* Data from SAMCO risk perception survey

importance in the PCA produced. SCI is calculated using linear combinations on GIS (raster calculator tool on ArcGIS) and applied to each building of the six studied municipalities. Due to the lack of data at building scale, SCI is equally applied for all the buildings of a same community. *Potential Consequences Index* is then calculated by adding the index scores of the 4 sub-indices (SCI, PII, SFI and IFI) (Fig. 3). PCI is finally reclassified in 5 classes and mapped. Using a matrix, PCI map is combined with a flood hazard map (in 5 classes) to obtain a type 1957 flood risk map (Fig. 5).

**Figure 7:** Detail of weights assigned to the criteria used in SCI calculation. Criteria with an \* are those derived from the risk perception survey.

| Criteria                       | Authors | Clark <i>et al.</i> , 1998 | Cutter <i>et al.</i> , 2003 | Fekete, 2009 | Flanagan <i>et al.</i> , 2012 | Guillard-Goncalves <i>et al.</i> , 2014 | Zhang and You, 2014 | Chang <i>et al.</i> , 2015 | Huang <i>et al.</i> , 2015 | Koks <i>et al.</i> , 2015 | Nelson <i>et al.</i> , 2015 | Frigerio <i>et al.</i> , 2016 | Karagiorgos <i>et al.</i> , (2016) | Rogelis <i>et al.</i> , 2016 | Armas <i>et al.</i> , 2017 | Atoca-Jimenez <i>et al.</i> , 2017 | Heß, 2017 | Total |
|--------------------------------|---------|----------------------------|-----------------------------|--------------|-------------------------------|-----------------------------------------|---------------------|----------------------------|----------------------------|---------------------------|-----------------------------|-------------------------------|------------------------------------|------------------------------|----------------------------|------------------------------------|-----------|-------|
| Age                            |         |                            |                             |              |                               |                                         |                     |                            |                            |                           |                             |                               |                                    |                              |                            |                                    |           | 16    |
| Education level                |         |                            |                             |              |                               |                                         |                     |                            |                            |                           |                             |                               |                                    |                              |                            |                                    |           | 14    |
| Employment                     |         |                            |                             |              |                               |                                         |                     |                            |                            |                           |                             |                               |                                    |                              |                            |                                    |           | 14    |
| Special need population        |         |                            |                             |              |                               |                                         |                     |                            |                            |                           |                             |                               |                                    |                              |                            |                                    |           | 13    |
| Income                         |         |                            |                             |              |                               |                                         |                     |                            |                            |                           |                             |                               |                                    |                              |                            |                                    |           | 12    |
| Gender                         |         |                            |                             |              |                               |                                         |                     |                            |                            |                           |                             |                               |                                    |                              |                            |                                    |           | 11    |
| Race and ethnicity             |         |                            |                             |              |                               |                                         |                     |                            |                            |                           |                             |                               |                                    |                              |                            |                                    |           | 10    |
| Family structure               |         |                            |                             |              |                               |                                         |                     |                            |                            |                           |                             |                               |                                    |                              |                            |                                    |           | 9     |
| Medical service                |         |                            |                             |              |                               |                                         |                     |                            |                            |                           |                             |                               |                                    |                              |                            |                                    |           | 9     |
| Population (number or density) |         |                            |                             |              |                               |                                         |                     |                            |                            |                           |                             |                               |                                    |                              |                            |                                    |           | 8     |
| Mobility                       |         |                            |                             |              |                               |                                         |                     |                            |                            |                           |                             |                               |                                    |                              |                            |                                    |           | 7     |
| Equipment                      |         |                            |                             |              |                               |                                         |                     |                            |                            |                           |                             |                               |                                    |                              |                            |                                    |           | 7     |
| Recent arrival                 |         |                            |                             |              |                               |                                         |                     |                            |                            |                           |                             |                               |                                    |                              |                            |                                    |           | 6     |
| Employment in primary sector   |         |                            |                             |              |                               |                                         |                     |                            |                            |                           |                             |                               |                                    |                              |                            |                                    |           | 5     |
| Owner/Tenant                   |         |                            |                             |              |                               |                                         |                     |                            |                            |                           |                             |                               |                                    |                              |                            |                                    |           | 4     |
| Municipality budget            |         |                            |                             |              |                               |                                         |                     |                            |                            |                           |                             |                               |                                    |                              |                            |                                    |           | 3     |

Table 2: First set of criteria selected for the calculation of SCI and their impacts on social vulnerability.

| Variable                                                                                | Increase (+) or decrease (-)<br>social vulnerability if high |
|-----------------------------------------------------------------------------------------|--------------------------------------------------------------|
| Percent of children 15 and under                                                        | +                                                            |
| Percent of population 60 years or older                                                 | +                                                            |
| Population density (in habs / km <sup>2</sup> )                                         | +                                                            |
| Percent of unemployed people                                                            | +                                                            |
| Percent of population with high socioeconomic status*                                   | -                                                            |
| Percent of population employed in primary sector                                        | +                                                            |
| Percent of household with no vehicle available                                          | +                                                            |
| Household incomes / average national household incomes                                  | -                                                            |
| Percent of population which is mentally disabled                                        | +                                                            |
| Percent of foreign population                                                           | +                                                            |
| Percent of population with no high diploma (> BAC)                                      | +                                                            |
| Percent of single-parent family                                                         | +                                                            |
| Percent of principal residence                                                          | +                                                            |
| Percent of the population which moved in less than 2 years ago                          | -                                                            |
| Distance to nearest medical centre (in decimal h)                                       | +                                                            |
| Communities financial solvency (cash flow = operating charges - debt annuity / incomes) | -                                                            |
| Percent of IP who never experienced a catastrophic event**                              | +                                                            |
| Percent of IP considering risk as low**                                                 | +                                                            |
| Percent of IP considering themselves as sufficiently informed on risk**                 | -                                                            |
| Percent of IP who responded not knowing what to do if a catastrophic event occurs**     | +                                                            |
| Percent of IP who have not confidence in local planners**                               | +                                                            |

IP: investigated population

\* Artisans, Commerçants et Chefs d'Entreprise ou Cadres et Profession Intellectuelle Supérieur

\*\* Data from SAMCO risk perception survey

Table 1: Synthesis of the criteria usually used for the social vulnerability assessment.



## 2.3 Flood hazard mapping

Several hazard maps were produced in the SAMCO project. To focus ourselves on the new method found to assess physical and social consequences, a single scenario of flooding is considered in this paper. The selected scenario represents a flood type 1957 (R.I. >100 years). We voluntarily selected a scenario with the more important spatial extend to highlight the differences between the PDI and the PCI. The “type 1957” flood map was realized using the hydraulic modelling software HecRAS®. Fifteen cross sections representing a linear stream of 58.2 km were characterized (Tab. 3). Due to the lack of accurate data for all the streams of the sub-catchment, only eight of them were taken into account in our model (Tab. 3). Geometry (stream, river banks and flood plains) was extracted from a DEM (Digital Elevation Model) at 1 m resolution. This DEM was produced with LIDAR data (*Light Detection And Ranging*) provided by the Regional Natural Park of Queyras (PNRQ). Flooded surfaces (extend, deep, speed) were extrapolated using 371 sections, extracted from our DEM. To take into account the protection along the reaches, dikes and artificialized channels were incorporated into the model. The flooded surface generated has an extension of 2.88 km². This envelope provides a good overview of the water flows and allows a quick and clear visualization of the potentially flooded areas. The flood map used in this paper was reclassified in 5 classes considering water elevation (Fig. 8).

| Reach | Reach description                                                          | Lenght (in m) | Cross-sections (nb) | Flow, type 1957 (in m³/s) |
|-------|----------------------------------------------------------------------------|---------------|---------------------|---------------------------|
| T1    | Guil River, upstream to the confluence with the Ségure torrent             | 11.3          | 50                  | 180                       |
| T2    | Ségure torrent                                                             | 1.29          | 17                  | 89                        |
| T3    | Guil River, upstream to the confluence with the Bouchet torrent            | 3.05          | 17                  | 269                       |
| T4    | Bouchet, upstream to the confluence with the Montette torrent              | 3.15          | 42                  | 30                        |
| T5    | Montette torrent                                                           | 0.48          | 8                   | 30                        |
| T6    | Bouchet, downstream to the confluence with the Montette torrent            | 3.31          | 20                  | 160                       |
| T7    | Guil River, upstream to the confluence with the Lombard torrent            | 4.54          | 23                  | 429                       |
| T8    | Lombard torrent                                                            | 0.52          | 16                  | 50                        |
| T9    | Guil River, upstream to the confluence with the Peymin torrent             | 1.09          | 11                  | 479                       |
| T10   | Peymin torrent                                                             | 0.9           | 24                  | 55                        |
| T11   | Guil River, upstream to the confluence with the Aigues Torrent             | 4.1           | 23                  | 534                       |
| T12   | Aigue Agnelle torrent                                                      | 5.1           | 26                  | 136                       |
| T13   | Aigue Blanche torrent                                                      | 5.18          | 26                  | 103                       |
| T14   | Aigues torrent, downstream to the confluence between the 2 Aigues torrents | 5.43          | 37                  | 239                       |
| T15   | Guil River, downstream to the confluence with the Aigues torrent           | 8.84          | 21                  | 773                       |

**Table 3:** Additional information on the hydrological model produced with HecRAS® software.

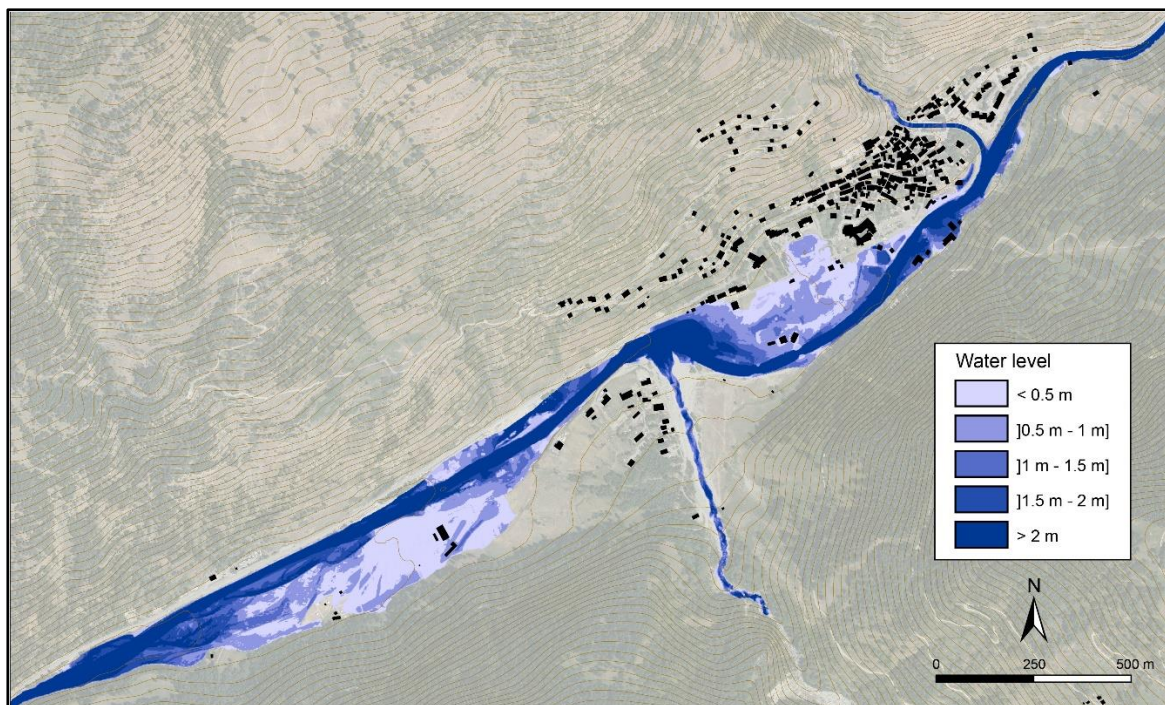

**Figure 8:** Zoom on type 1957 flood map produced for Aiguilles village.



Using the methods previously described, PDI and PCI were calculated and mapped for the six municipalities of the Upper-Guil catchment. The distribution of the values calculated for both PDI and PCI are symmetric. As a consequence we chose to classify all the maps in five classes using average and standard deviation. To get a better understanding, PDI results are described before PCI's one.  
 355 Then, a complete comparison between PDI and PCI results is proposed. To highlight differences between the two models, networks and land cover/uses are ignored in this part of the analysis.

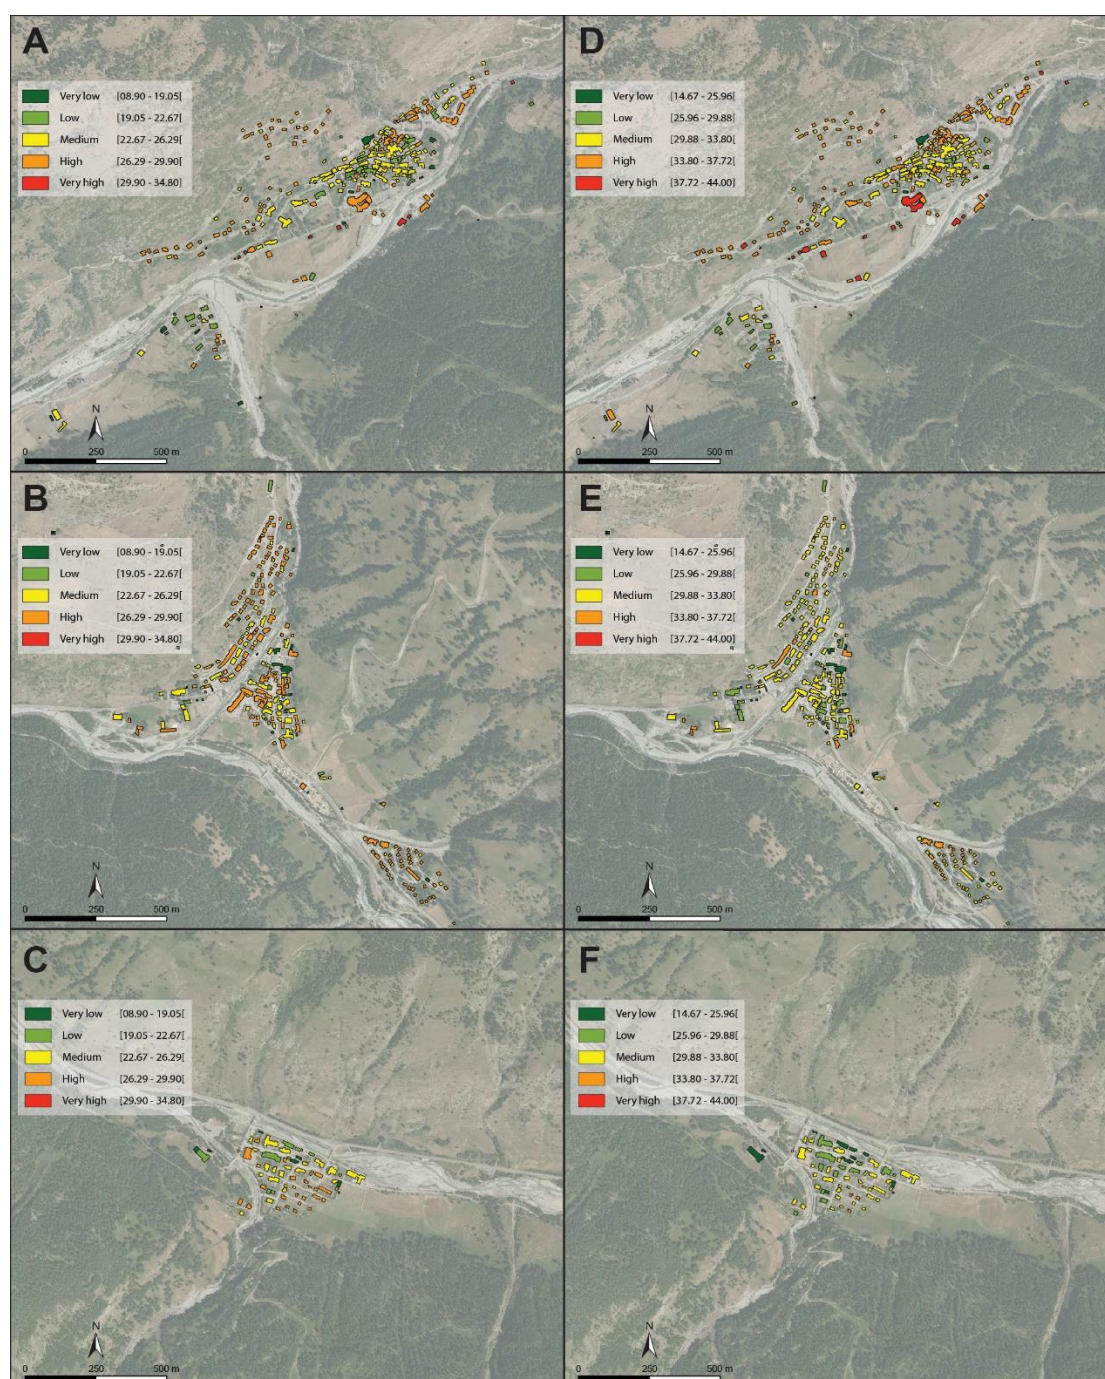

**Figure 9:** Comparison between PDI and PCI maps. A – Zoom on PDI map produced for Aiguilles village; B – Zoom on PDI map produced for Abriès village; C – Zoom on PDI map produced for Ristolas village; D – Zoom on PCI map produced for Aiguilles village; E – Zoom on PCI map produced for Abriès village; F – Zoom on PCI map produced for Ristolas village.  
 360



### 3.1 Description of the PDI results

The PDI map for flooding is obtained for the Upper Guil catchment by summing the direct *Physical Injury Index* (PII), *Structural and Functional Index* (SFI) and *Indirect Functional Index* (IFI) (Fig. 3). CTI scores for buildings range between 8.9 and 34.8 (mean: 24.5) (Fig. 9, A, B and C). Looking for the sub-indices, the highest scores are generally observed for the *Physical Injury Index* (mean: 10.9) and the lowest for the *Socio-Economic Index* (mean: 4.1). *Structural and Functional Index* scores are comprised between the both (mean: 9.5). Zooms on Aiguilles, Abriès and Ristolas villages are shown in Fig. 9, A, B and C. The produced map displays a majority of buildings with moderate to high scores of total potential consequences for the all studied communities. Buildings with the highest scores are mainly located in the vicinity of the Guil River or one of its main tributaries (Fig. 9, A, B and C). Major stakes such rescue centres (hospital, fire-station etc.), town-halls and schools are also classified with a high degree of potential consequences. This is due to their important function in local life. Conversely, churches, sheds and warehouses have a low degree of potential consequences. In town centres, buildings with trading or touristic function are generally in the “high” consequence class whereas those which only have a housing function are classified as “moderate”. Sparse housing areas (mostly located on the heights), have a high degree of total potential consequences because they were not constructed to resist floods (large opening on ground floor, less resistant building material etc.). In most cases, these houses have virtually no chance to be impacted by a flood because they are located away from the torrential streams.

### 3.2 Description of the PCI results

The PCI is obtained by summing the direct *Physical Injury Index* (PII), the direct *Structural and Functional Index* (SFI), the *Indirect Functional Index* (IFI) and the new *Social Consequences Index* (SCI) (Fig. 3). PCI scores calculated for building range from 14.7 to 44 (mean: 31.8) (Fig. 9, D, E and F). SCI scores calculated for the six municipalities ranged between 5.2 and 9.2 (mean: 7.2) (Fig. 10). They are in the same order of magnitude than those of the 3 other indices used in PCI calculation (PII, SFI and IFI). The PCI map produced for the Upper-Guil catchment displays a majority of buildings classified with moderate degree of total potential consequences. (Fig. 9, D, E and F). At the community level, buildings classified with high or very high degree of potential consequences are mainly located near the Guil River or one of its main tributaries. Collective housing and major stakes (hospital, town-halls, schools etc.) are generally classified with higher potential consequences (Fig. 9, D, E and F) than individual housing. In most case, churches, sheds and warehouses are classified with a low or very low degree of potential consequences. Despite these general tendencies, we observe differences from a community to another. At the Upper-Guil catchment level, the studied communities can be divided in 3 groups (Fig. 9 and 10). A first group is made of communities with a large number of building classified with a high and very high degree of total potential consequences: Aiguilles and Saint Véran. A second one is formed by communities with most of their buildings being classified with moderate potential consequences: Château-Ville-Vieille and Molines-en-Queyras. The third group is composed by communities with buildings classified with low to moderate total potential consequences: Abriès and Ristolas. These differences between communities are directly related to *Social Consequences Index* (SCI) scores. The comparison between Ristolas and Aiguilles communities speaks for itself (Fig. 9, D and F). Ristolas community has the lowest SCI score (Fig. 10). People living here have a good perception of flood related risks indicating a high level of preparedness. They have confidence in local managers and there is only a few dependent people (children or elderly

people) to care of when an unexpected situation arises. This suggests a good capacity to react when confronted to a catastrophic episode. In addition, they are globally wealthier than the other studied communities. They have theoretically a better ability to quickly recover after a material loss. By contrast, Aiguilles community has high CTI and SCI scores indicating a lower ability to cope with hazards (Fig. 10). Compared to other communities, Aiguilles have more dependant people to care of. In addition, people have a lack information on flood risks and tends to underestimate the danger represented by floods. Aiguilles citizens earn less and have less confidence in their local managers. In the case of Ristolas, CSI tend to reduce the total potential consequences contrary to Aiguilles. In other words, a community with resilient population can qualify results obtained for physical consequences.

| SC - Variable<br>Community | SC - A | SC - B | SC - C | SC - D | SC - E | SC - F | Score obtained for<br>Social Consequences |
|----------------------------|--------|--------|--------|--------|--------|--------|-------------------------------------------|
| Ristolas                   | 0.10   | 0.10   | 1      | 0.10   | 0.60   | 0.40   | 5.20                                      |
| Abriès                     | 0.60   | 0.40   | 0.70   | 0.40   | 0.10   | 0.60   | 5.70                                      |
| Aiguilles                  | 0.80   | 0.80   | 0.70   | 0.80   | 0.60   | 0.60   | 9.20                                      |
| Château-Ville-Vieille      | 0.40   | 0.40   | 0.70   | 0.60   | 0.40   | 0.60   | 6.60                                      |
| Molines-en-Queyras         | 0.80   | 0.40   | 0.70   | 0.60   | 0.60   | 0.40   | 7.60                                      |
| Saint-Véran                | 0.80   | 0.40   | 1      | 1      | 0.60   | 0.40   | 9.00                                      |

**Figure 10:** SCI scores calculated for the 6 municipalities of the Upper-Guil catchment.

### 3.3 Comparison between PDI and PCI maps

The PCI is developed as an upgrade of the PDI method. As a consequence, we can observe some similarities between PDI and PCI maps produced (Fig 9). In most of case, buildings classified with the highest level of potential consequences are buildings considered as essential in the local life (city hall, hospital, police and fire station etc.). In both maps, buildings located in an area previously inundated are also classified with high degree of total potential consequences (Fig. 9, A, B, D and E). Likewise, building classified with low or very low potential consequences are generally buildings with no essential function in local life like churches, sheds, warehouses or empty buildings. Moreover, buildings constructed in the last 20 years (mostly individual housing) have generally a higher degree of potential consequences than older buildings. With the PCI method, the influence of the physical consequences indices (PII, SFI and IFI) is thus globally preserved at the community level. The introduction of SCI allows us to qualify the total potential consequences of the elements at risk with regard to the ability of each community to cope with hazards. Ristolas and Abriès have low SCI scores. Floods will have less impact for these communities. As a result element at risks are classified with lower total potential consequences in comparison with PDI. By contrast Aiguilles and Saint Véran communities have high SCI scores indicating a low ability to cope with hazard. The buildings of these two communities are thus classified with higher total potential consequences in the PCI map and higher potential risk in the risk map produced (Fig. 11). As SCI is equally applied for all the buildings of a same community, it tends to homogenise PCI scores at the community level. In comparison with PDI map, the minimum scores values are uplifted resulting in a partial loss of information. This is particularly true in the communities with the highest SCI scores (Aiguilles and Saint-Véran). This partial loss has however, a positive impact on the readability of the maps. The global level of potential consequences of each community is evident and allows us to compare each community with one another. This is not so clear with the PDI method. In addition, the smoothing of

the results tends to highlight the most vulnerable stakes. As a result, the PCI map is easier to understand for local managers than the PDI map.

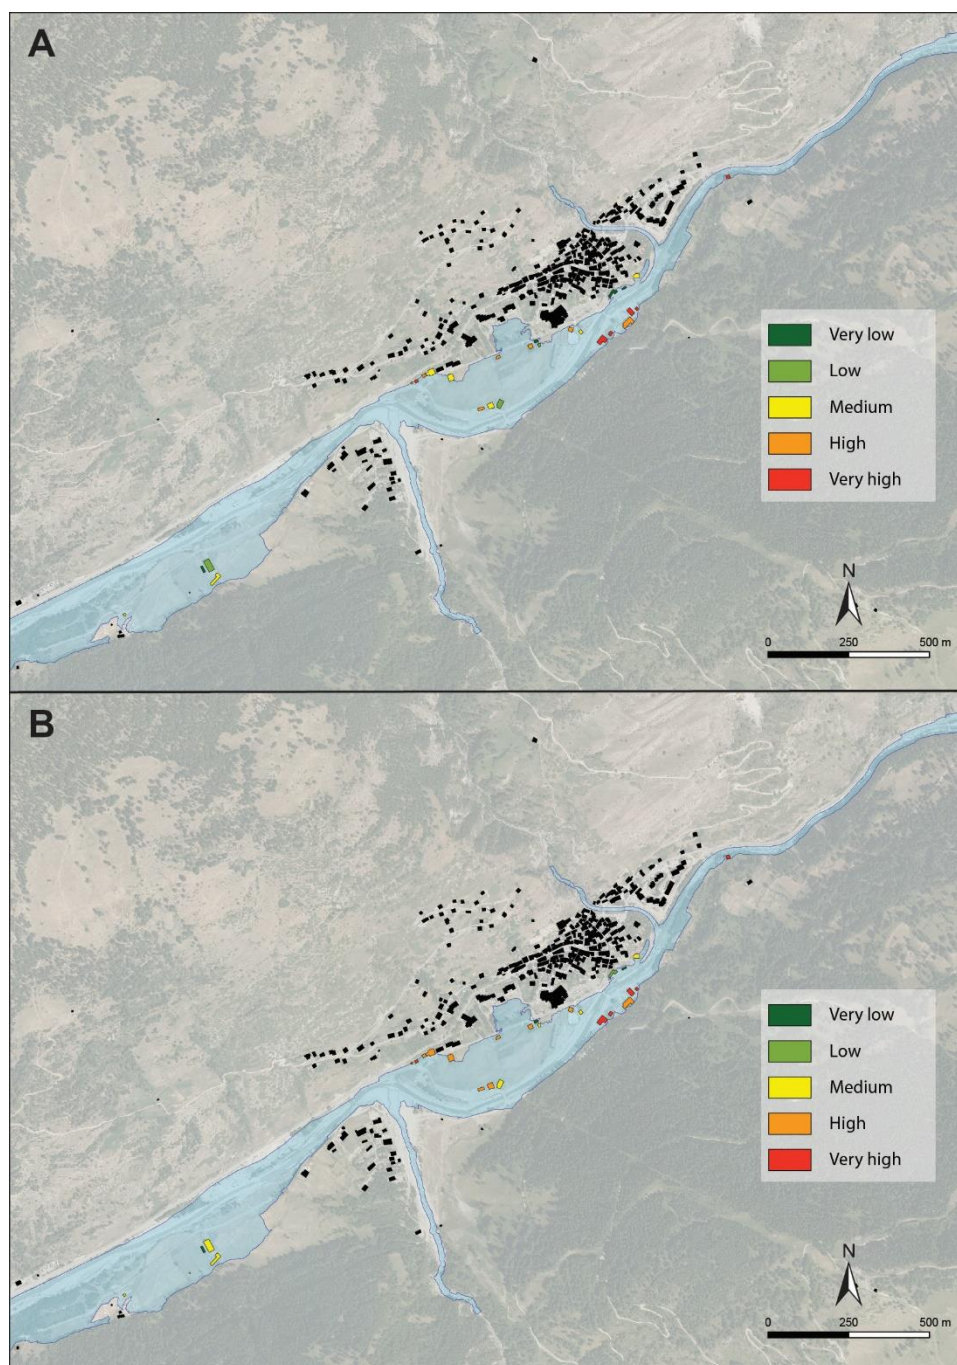

**Figure 11:** Comparison between type 1957 flood risk maps produced using PDI and PCI. A – Flood risk map produced using PDI; B – Flood risk map produced using PCI.

### *Conclusions and perspectives*

In the present paper we explored the possibility to assess the physical and the social vulnerability together through an indicator based method. To perform this study, we opted for an upgrade of the *Potential Damage Index* method, which was originally developed to assess the physical consequences of defined hazards on element at risks. After an intensive review of the existing

published reference on social vulnerability we selected 6 criteria derived from national French census data and a risk perception survey carried out on the field. These criteria were combined to produce a new sub-index representing the ability of communities to cope with hazard. The new *Social Consequence Index* was integrated in the PDI methodology to obtain the *Potential Consequences Index*. The PCI is then tested on the six municipalities of the Upper-Guil catchment to assess the potential consequences of a high magnitude flood event on element at risks (R.I. >100 years).

The upgrade made on the PDI method provides many benefits. First, the new SCI introduces criteria providing information on the three phases of risk management: preparedness, crisis management and recovery. By using data derived from a survey, the PCI method also displays information on the perception of the inhabitants regarding risk management. The introduction of elements coming from social vulnerability adds thus an extra-dimension to the total consequence map. It allows us to qualify the potential physical consequences (physical injury, structural and functional consequences) on element at risk considering the global resilience of local communities. Then, with the PCI method the level of potential consequences of each community is clearly displayed and the most vulnerable elements at risks are easy to identify. Therefore, PCI method allow us to quickly compare communities in their ability to cope with hazard. The PCI map is consequently easily understandable by risk managers or local decision makers and will help them set up adapted mitigation measures on the most vulnerable areas. Another benefit of the method result in the data used. Because it is mostly based on national data, it is easy to transpose in other places.

The main limitation of the PCI method is that a unique value of the SCI is applied to the overall building of a same community. By proceeding so, SCI tends to homogenize PCI by uplifting minimum values. For the communities with high SCI scores, this may simplify the information displayed. This scaling issues can imply a loss of information which may affect the distribution of PCI scores and thus, the choices of mapping classes. The amount of data required to perform this kind of analysis represents another limit. The method is based on the utilisation of many different criteria. Collecting them requires consequent fieldwork and must be time-consuming. This is especially true for criteria derived from a risk perception survey. Consequently, the use of the PCI model at large scale will be quite difficult.

Some elements which may improve the PCI model will be investigated in future works. First of all, we will expand the scale of our study by including other communities of Southern French Alps studied in the SAMCO project. Located in the Ubaye valley, near our study area, these communities display similar physical and socio-economic characteristics. Their inclusion will provide a more representative selection for statistics investigations. Another lead will be an adaptation of the survey protocol in order to get data at smaller scale such as district scale. Another solution to gain in precision will be the use of a desegregation model to distribute PCI at building scale.

The method presented in this paper will be a source of significant progress for vulnerability assessment. By considering the two main components of vulnerability, the physical one and the socio-economic one, this work may provide an important tool for local authorities. The PCI will help them to better understand their strength and weakness and will be useful to develop appropriate mitigation measures at the local and regional level.

#### ***Author contribution***

Benoît Carlier and Anne Puissant designed the experiments and carried them out. Benoît Carlier developed the model and performed the simulations. Benoît Carlier and Constance Dujarric realised

the questionnaire survey. Gilles Arnaud-Fassetta supervised Benoît Cralier and Constance Dujarric works. Benoît Carlier prepared the manuscript with contributions from all co-authors.

## 495 ***Competing interests***

The authors declare that they have no conflict of interest.

## ***Acknowledgement***

500 This paper is part of a larger research project (SAMCO Project ANR-12-SENV-0004.) bringing together research centres (BRGM, IPGS, IRSTEA), laboratories (LIVE-UMR7362, PRODIG-UMR8586, GEODE-UMR5602) and a technologically advanced SME (GEO-HYD) to evaluate mountain risk in a context of global changes (i.e. socio-economic and climatic).

This research is a part of the PhD research work of B. Carlier (*Evaluation, cost and management of torrential and gravitational risk in mountainous environment*; defence thesis in 2018).

505 We would like to thank Bérengère Charnay from the Parc Naturel Régional du Queyras and the municipality councils of Ristolas, Abriès, Aiguilles, Château-Ville-Vieille, Molines-en-Queyras and St Véran for their hospitality, their help and their interest in our works.

## ***References***

- 510 Aitsi-Selmi, A., Egawa, S., Sasaki, H., Wannous, C., Murray, V.: The Sendai Framework for Disaster Risk Reduction: Renewing the Global Commitment to People's Resilience, Health, and Well-being. *Int J Disaster Risk Sci*, 6:164–176, DOI 10.1007/s13753-015-0050-9, 2015
- 515 Alcántara-Ayala, I., Altan, O., Baker, D., Briceño, S., Cutter, S., Gupta, H., Holloway, A., Ismail-Zadeh, A., Jiménez Díaz, V., Johnston, D., McBean, G., Ogawa, Y., Paton, D., Porio, E., Silbereisen, R., Kuniyoshi, T., Valsecchi, G., Vogel, C., Wu, G., Zhai, P.: Disaster Risks Research and Assessment to Promote Risk Reduction and Management, ICSU-ISSC AD-HOC Group on Disaster Risk Assessment, March 12, 2015, 1-47, 2015.
- Armas, I., Gavris, A.: Social vulnerability assessment using spatial multi-criteria analysis (SEVI model) and the Social Vulnerability Index (SoVI model) – a case study for Bucharest, Romania. *Nat. Hazards Earth Syst. Sci.*, 13, 1481–1499, DOI: 10.5194/nhess-13-1481-2013, 2013
- 520 Armas, I., Toma-Danila, D., Ionescu, R., Gavris, A.: Vulnerability to Earthquake Hazard: Bucharest Case Study, Romania. *Int. J. Disaster Risk Sci.*, 8:182–195, DOI 10.1007/s13753-017-0132-y, 2017.
- Arnaud-Fassetta G., Cossart E., Fort M.: Hydro-geomorphic hazards and impact of man-made structures during the catastrophic flood of June 2000 in the Upper Guil catchment (Queyras, French Alps). *Geomorphology*, 66, 41-67, DOI:10.1016/j.geomorph.2004.03.014, 2005.
- 525 Arnaud-Fassetta G., Fort M.: La part respective des facteurs hydro-climatiques et anthropiques dans l'évolution récente (1956-2000) de la bande active du Haut-Guil, Queyras, Alpes françaises du Sud, Géosystèmes méditerranéens et montagnards. Un mélange offert à Maurice Jorda. *Méditerranée*, 1-2, 143-156, DOI: 10.3406/medit.2004.3350, 2004.



- Arnaud-Fassetta G., Fort M.: Hydro-bio-morphological changes and control factors of an upper Alpine valley bottom since the mid-19th century. Case study of the Guil River, Durance catchment, southern French Alps, *The Little Ice Age in the Mediterranean*, Méditerranée, 122, 159-182, DOI: 10.4000/mediterranee.7245, 2014.
- 530 Aroca-Jimenez, E., Bodoque, J. M., Garcia, J. A., Diez-Herrero, A.: Construction of an integrated social vulnerability index in urban areas prone to flash flooding. *Nat. Hazards Earth Syst. Sci.*, 17, 1541–1557, DOI: 10.5194/nhess-17-1541-2017 ,2017
- 535 Barroca, B., Pottier, N., Lefort, E.: Analyse et évaluation de la vulnérabilité aux inondations du bassin de l’Orge aval, *Septièmes Rencontres de Théo Quant*, janvier 2005, 1-12, 2005.
- Birkmann, J.: *Measuring Vulnerability to Natural Hazards: Towards Disaster Resilient Societies*, New York: United Nations Publications, 2, 55-77, 2006.
- 540 Birkmann, J., Cardona, O.D., Carreño, M.L., Barbat, A.H., Pelling, M., Schneiderbauer, S., Kienberger, S., Keiler, M., Alexander, D., Zeil, P. and Welle, T.: Framing vulnerability, risk and societal responses: the MOVE framework. *Nat Hazards*, 67:193–211, DOI 10.1007/s11069-013-0558-5, 2013.
- Blaikie, P., Cannon, T., Davis, I., Wisner, B.: *At Risk: Natural Hazards, Peoples’ Vulnerability and Disasters*, London: Routledge, 1994.
- 545 Bründl, M., Romang, H.E., Bischof, N. and Rheinberger, C.M.: The risk concept and its application in natural hazard risk management in Switzerland. *Nat. Hazards Earth Syst. Sci.*, 9, 801–813, DOI: 10.5194/nhess-9-801-2009, 2009
- 550 Chakraborty, J., Tobin, G.A., Montz, B. E.: Population Evacuation: Assessing Spatial Variability in Geophysical Risk and Social Vulnerability to Natural Hazards, *Nat. Hazards Rev*, 6:23–33, DOI: 10.1061/(ASCE)1527-6988(2005)6:1(23), 2005.
- Chang, S.E., Yip, J.Z.K., Van Zijll de Jong, S.L., Chaster, R., Lowcock, A.: Using vulnerability indicators to develop resilience networks: a similarity approach. *Nat. Hazards Rev*, 78:1827–1841, DOI 10.1007/s11069-015-1803-x, 2015.
- 555 Ciurean, R.L., Schröter, D., Glade, T.: Conceptual Frameworks of Vulnerability Assessments for Natural Disasters Reduction. In “Approaches to Disaster Management - Examining the Implications of Hazards, Emergencies and Disasters”, *Social Sciences*, Edited by John Tiefenbacher, 228 p DOI: 10.5772/55538, 2013.
- 560 Clark, G.E., Moser, S.C., Ratick, S.J., Dow, K., Meyer, W.B., Emani, S., Jin, W., Kasperson, J.X., Kasperson, R.E., Schwarz, H.E.: Assessing the vulnerability of coastal communities to extreme storms: the case of Revere, MA., USA, *Mitigation and Adaptation Strategies for Global Change* 3, 59-82, DOI: 10.1023/A:1009609710795, 1998.
- Cutter, L.S., Boruff, B.J., Lynn Shirley, W., (2003). *Social Vulnerability to Environmental Hazards*, *SOCIAL SCIENCE QUARTERLY*, 84, 2, 242-260, DOI: 10.1111/1540-6237.8402002, 2003.

- Cutter, L.S., Finch, C.: Temporal and spatial changes in social vulnerability to natural hazards. Publication of National Academy of Sciences of the USA, Vol. 107, no. 7, 2301-2306, DOI: 10.1073\_pnas.0710375105, 2008
- Heß, V. D. C.: Weigh(t)ing the dimensions of social vulnerability based on a regression analysis of disaster damages. Nat. Hazards Earth Syst. Sci. Discuss., DOI: 10.5194/nhess-2017-74, submitted 2017.
- Ebert, A., Kerle, N. and Stein, A.: Urban social vulnerability assessment with physical proxies and spatial metrics derived from air- and spaceborne imagery and GIS data. Nat Hazards, 48:275–294, DOI: 10.1007/s11069-008-9264-0, 2009.
- Eidsvig, U. M. K., Kristensen, K. and Vangelsten, B. V.: Assessing the risk posed by natural hazards to infrastructures. Nat. Hazards Earth Syst. Sci., 17, 481–504, DOI: 10.5194/nhess-17-481-2017, 2017.
- Fekete, A.: Validation of a social vulnerability index in context to river-floods in Germany, Nat. Hazards Earth Syst. Sci., 9, 393-403, DOI: 10.5194/nhess-9-393-2009, 2009.
- Flanagan, B.E., Gregory, E.W., Hallisey, E.J., Heitgerd, J.L., Lewis, B.: A Social Vulnerability Index for Disaster Management, Journal of Homeland Security and Emergency Management, 8, 1, Article 3, DOI: 10.2202/1547-7355.1792, 2012.
- Forino, G., von Meding, J. & Brewer, G.J.: A Conceptual Governance Framework for Climate Change Adaptation and Disaster Risk Reduction Integration. Int Jurnal Disaster Risk Sci, 6: 372. DOI: 10.1007/s13753-015-0076-z, 2015
- Fort M., Arnaud-Fassetta G., Cossart E., Beaudouin B., Bourbon C., Debail B., Einhorn B. : Impacts et signification hydromorphologique de la crue du Guil de juin 2000 (Haut Queyras), Geomorphology: from Expert Opinion to Modelling. A tribute to Professor Jean-Claude Flageollet. Proceedings of the Symposium held in Strasbourg, France, April 26-27 2002, CERG Editions, 159-166, 2002.
- Fort M., Arnaud-Fassetta G., Bétard F., Cossart E., Madelin M., Lissak C., Viel V., Bouccara F., Carlier B., Sourdot G., Tassel A., Geai M.-L., Bletterie X., Charnay B.: Sediment dynamics and channel adjustments following torrential floods in an upper Alpine valley (Guil River, Southern French Alps), Engineering Geology for Society and Territory. Volume 3: River Basins, Reservoir Sedimentation and Water Resources, Chapter 65. Springer, Cham, Heidelberg, New York, Dordrecht, London, 313-317, DOI: 10.1007/978-3-319-09054-2\_65, 2014.
- Frigerio, I., Ventura, S., Strigaro, D., Mattavelli, M., De Amicis, M., Mugnano, S., Boffi, M.: A GIS-based approach to identify the spatial variability of social vulnerability to seismic hazard in Italy, Applied Geography, 74, 12-22, DOI: 10.1016/j.apgeog.2016.06.014, 2016.
- Fuchs, S., Heiss, K., Hübl, J.: Towards an empirical vulnerability function for use in debris flow risk assessment, Nat. Hazards Earth Syst. Sci., 7, 495-506, DOI: 10.5194/nhess-7-495-2007, 2007.
- Fuchs, S.: Susceptibility versus resilience to mountain hazards in Austria - paradigms of vulnerability revisited, Nat. Hazards Earth Syst., 9, 337-352, DOI: 10.5194/nhess-9-337-2009, 2009.

- Fuchs, S., Birkmann, J., Glade, T.: Vulnerability assessment in natural hazard and risk analysis: current approaches and future challenges, *Nat. Hazards Earth Syst.*, 64, 1969-1975, DOI: 10.1007/s11069-012-0352-9, 2012.
- Glade, T.: Vulnerability assessment in landslide risk analysis, *DIE ERDE* 134 (2), Beitrag zur Erdsystemforschung, 123-146, 2003.
- Guillard-Gonçalves, C., Cutter, S.L., Emrich, C.T, Zêzere, J.L.: Application of Social Vulnerability Index (SoVI) and delineation of natural risk zones in Greater Lisbon, Portugal, *Journal of Risk Research*, 24 p, DOI: 10.1080/13669877.2014.910689, 2014.
- Hewitt, K., & Metha, M.: Rethinking risk and disasters in mountain areas. *Journal of Alpine Research*, 100-1, DOI: 10.4000/rga.1653, 2012.
- Huang, J., Su, F., Zhang, P.: Measuring Social Vulnerability to Natural Hazards in Beijing-Tianjin-Hebei Region, China. *Chin. Geogra. Sci.* 2015 Vol. 25 No. 4 pp. 472–485, DOI: 10.1007/s11769-015-0769-7, 2015
- IGN: Bd ORTHO/Bd TOPO, Hautes-Alpes, 2009.
- IGN: Registre Parcellaire Graphique, RPG, Hautes-Alpes, 2012.
- IGN: Réseau Natura 2000, documents d’objectif, BdCarto/BdCarthage, DREAL PACA, 2016.
- INSEE: Recensement de la Population 2006, Hautes-Alpes, exploitation principal, 2008.
- INSEE: Recensement de la Population 2012, Hautes-Alpes, exploitation principal, 2014.
- INSEE: Recensement de la Population 2014, Hautes-Alpes, exploitation principal 2014.
- IPCC: “Managing the Risks of Extreme Events and Disasters to Advance Climate Change Adaptation”. A Special Report of Working Groups I and II of the Intergovernmental Panel on Climate Change [Field C.B., Barros V., Stocker T.F., Qin D., Dokken D.J., Ebi K.L., Mastrandrea M.D., Mach K.J., Plattner G.-K., Allen S.K., Tignor M., Midgley P.M. (eds.)]. Cambridge University Press, Cambridge, UK, and New York, NY, USA, 582 pp, 2012.
- Jeffers, J.M.: Integrating vulnerability analysis and risk assessment in flood loss mitigation: An evaluation of barriers and challenges based on evidence from Ireland, *Applied Geography*, 37, 44-51, DOI: 10.1016/j.apgeog.2012.10.011, 2013.
- Kappes, M.S., Papathoma-Köhle, M., Keiler, M.: Assessing physical vulnerability for multi-hazards using an indicator-based methodology, *Applied Geography*, 32, 577-590, DOI: 10.1016/j.apgeog.2011.07.002, 2012.
- Karagiorgos, K., Thaler, T., Hübl, J., Maris, F. and Fuchs, S.: Multi-vulnerability analysis for flash flood risk management. *Nat Hazards*, 82-1: 63. DOI: 10.1007/s11069-016-2296-y, 2016.
- Keiler, M., Knight, J., and Harrison, S.: Climate change and geomorphological hazards in the eastern European Alps. *Philosophical Transactions of the Royal Society A* 368, 2461–2479. DOI: 10.1098/rsta.2010.0047, 2010.

- Keiler M., Fuchs S.: Vulnerability and Exposure to Geomorphic Hazards: Some Insights from the European Alps. In: Meadows M., Lin JC. (eds) *Geomorphology and Society. Advances in Geographical and Environmental Sciences*. Springer, Tokyo, DOI: 10.1007/978-4-431-56000-5\_10, 2016.
- 640 Koks, E.E., Jongman, B., Husby, T.G. and Botzen, W.J.W.: Combining hazard, exposure and social vulnerability to provide lessons for flood risk management. *Environmental science & policy* 47, 42–52. DOI: 10.1016/j.envsci.2014.10.013, 2015.
- Lafaysse, M.: Changement climatique et régime hydrologique d'un bassin alpin. Génération de scénarios sur la Haute-Durance, méthodologie d'évaluation et incertitudes associées. Thesis, University Toulouse III – Paul Sabatier, 2011.
- 645 Leone F., Colas A., Garcin Y., Eckert N., Jmelli V., Gherardi M.: The snow avalanches risk on Alpine roads network: Assessment of impacts and mapping of accessibility loss. *Journal of Alpine Research*, 102-4, DOI: 10.4000/rga.2491, 2014.
- Messner, F., Penning-Roswell, E., Green, C., Meyer, V., Tunstall, S. and van der Veen, A.: Evaluating flood damage: guidance and recommendations on principles and methods. FLOOD Site Project Report, p. 128, [www.floodsite.net](http://www.floodsite.net), 2007.
- 650 Meyer, V., Scheuer, S., Haase, D.: A multicriteria approach for flood risk mapping exemplified at the Mulde River, Germany, *Nat. Hazards Earth Syst. Sci.*, 48, 17-39, DOI: 10.1007/s11069-008-9244-4, 2009.
- 655 Nelson, K.S., Abkowitz, M. D., Camp, J. V.: A method for creating high resolution maps of social vulnerability in the context of environmental hazards, *Applied Geography*, 63, 89-100, DOI: 10.1016/j.apgeog.2015.06.011, 2015.
- Pachauri, R. K., Allen, M., Barros, V., Broome, J., Cramer, W., Christ, R., *et al.*: Climate change 2007: Synthesis report. Contribution of working groups i, ii and iii to the fifth assessment report of the intergovernmental panel on climate change, 2007.
- 660 Papathoma-Köhle, M., Kappes, M., Keiler, M., Glade, T.: Physical vulnerability assessment for alpine hazards: state of the art and future needs. *Nat Hazards Earth Syst Sci* 58:645–680, DOI 10.1007/s11069-010-9632-4, 2011.
- Papathoma-Köhle, M., Promper, C., Glade, T.: A Common Methodology for Risk Assessment and Mapping of Climate Change Related Hazards - Implications for Climate Change Adaptation Policies. *Climate*, 4 (1) p. 8, DOI: 10.3390/cli4010008, 2016
- 665 Papathoma-Köhle, M., Gems, B., Sturm, M., Fuchs, S.: Matrices, curves and indicators: A review of approaches to assess physical vulnerability to debris flows. *Earth-Science Reviews* 171:272–288, DOI : 10.1016/j.earscirev.2017.06.007, 2017.
- 670 Parc Naturel Régional du Queyras, PNRQ: Diagnostic de vulnérabilité du bassin versant du Guil aux inondations. Rapport définitif, Avril 2016, 1-48, 2016.
- Puissant, A., Malet, J.P., Maquaire, O.: Mapping landslide consequences in mountain areas: a tentative approach with a semi-quantitative procedure, *SAGEO*, 1-16, 2006.

- 675 Puissant, A., Van Den Eeckhaut, M., Malet, J.P., Maquaire, O.: Landslide consequence analysis: a region-scale indicator-based methodology, *Landslides*, 1-16, DOI: 10.1007/s10346-013-0429-x, 2013.
- Reghezza, M.: Vulnérabilité et risques: L'approche récente de la vulnérabilité. *Responsabilité et environnement*, 43, 9-13, 2006.
- Reghezza, M., Rufat S.: *The Resilience Imperative: Uncertainty, Risks and Disasters*, Elsevier-ISTE, 262 p, 2015.
- 680 Rogelis, M. C., Werner, M., Obregon, N. and Wright, N.: Regional prioritisation of flood risk in mountainous areas. *Nat. Hazards Earth Syst. Sci.*, 16, 833–853, DOI: 10.5194/nhess-16-833-2016, 2016
- 685 Rygel, L., O'Sullivan, D., Yarnal, B.: A method for constructing a social vulnerability index: an application to hurricane storm surges in a developed country, *Mitigation and Adaptation Strategies for Global Change*, 11, 741-764, DOI: 10.1007/s11027-006-0265-6, 2006.
- Schoeneich, P. and De Jong, C.: « Changes in the Alpine environment », *Journal of Alpine Research*, 96-4, DOI: 10.4000/rga.603, 2008
- 690 Steinführer, A., Kuhlicke, C., De Marchi, B., Scolobig, A., Tapsell, S., and Tunstall, S.: Local communities at risk from flooding: social vulnerability, resilience and recommendations for flood risk management in Europe, Report, Helmholtz Center for Environmental Research–UFZ, Leipzig, 2009.
- Tapsell, S., McCarthy, S., Faulkner, H., Alexander, M.: *Social vulnerability to natural hazards*, CapHaz-Net Consortium, WP4, .D4.1, 4-56, 2010.
- 695 Tarbotton, C., Dall'osso, F., Dominey-Howes, D. and Goff, J.: The use of empirical vulnerability functions to assess the response of buildings to tsunami impact: comparative review and summary of best practice. *Earth Sci. Rev.* 142, 120–134, DOI: 10.1016/j.earscirev.2015.01.002, 2015.
- Totschnig, R. and Fuchs, S.: Mountain torrents: Quantifying vulnerability and assessing uncertainties. *Engineering Geology* 155, 31–44, DOI: 10.1016/j.enggeo.2012.12.019, 2013.
- Tricart, J.: Etude de la crue de la mi-Juin 1957 dans la vallée du Guil, de l'Ubaye et de la Cerveyrete, *Revue de géographie Alpine*, 4, 565-627, DOI: 10.3406/rga.1958.1846, 1958.
- 700 UNDRO (1984) *Disaster prevention and mitigation—a compendium of current knowledge*, vol 11. Preparedness Aspects, New York.
- Varnes, D.J.: *Landslide Hazard Zonation: A Review of Principles and Practice*, Natural Hazards. UNESCO, Paris, 1984.
- Website of the SAMCO ANR project: <http://www.anr-samco.com>, 2017.
- 705 Wood, N.J., & Good, J.W.: Vulnerability of Port and Harbor Communities to Earthquake and Tsunami Hazards: The Use of GIS in Community Hazard Planning, *Coastal Management*, 32:3, 243-269, DOI: 10.1080/08920750490448622, 2004.



Wu, S.Y., Yarnal, B., Fisher, A.: Vulnerability of coastal communities to sea-level rise: a case study of Cape May County, New Jersey, USA, *Clim Res* 22, 255-270, DOI: 10.3354/cr022255, 2002.

- 710 Zahran, S., Brody, S.D., Peacock, W.G., Vedlitz, A., Grover, H.: Social vulnerability and the natural and built environment: a model of flood casualties in Texas, *Disasters*, 32 (4), 537-560, DOI: 10.1111/j.1467-7717.2008.01054.x, 2008.

Zhang, Y. L., You, W. J.: Social vulnerability to floods: a case study of Huaihe River Basin. *Nat Hazards* (2014) 71:2113–2125, DOI: 10.1007/s11069-013-0996-0, 2014.

- 715 Zingari, P.C., & Fiebiger, G.: Mountain risks and hazards, *Unasylva* 208, 53, 71-77, 2002.
